# Supplementary material for: Equal Opportunity for Low-Degree Network Nodes: A PageRank-Based Method for Protein Target Identification in Metabolic Graphs
Source: PLoS One. 2013 Jan 29;8(1):e54204. doi: 10.1371/journal.pone.0054204 (PMC3558500; doi:10.1371/journal.pone.0054204)
Supplement: Table S2 — The degree, in-degree, PPR and rPPR data for the metabolic network of of Plasmodium falciparum . (XLS) [file pone.0054204.s002.xls]

## Sheet: pfa
Node	PPR In	Degree	In-degree	PPR in / in-degree	Alpha: 0.85
R00173	0.0122842	3	2	0.00614209
R00174	0.0122842	3	2	0.00614209
R03316	0.00429916	8	2	0.00214958
R01890	0.00240574	3	2	0.00120287
R01021	0.00240574	3	2	0.00120287
R07604	0.0019629	8	2	0.000981448
R07602	0.0019629	8	2	0.000981448
R07600	0.0019629	8	2	0.000981448
R01961	0.00175145	4	2	0.000875726
R01940	0.000826242	3	1	0.000826242
R01626	0.00813515	19	10	0.000813515
R00765	0.00242427	6	3	0.00080809
R01234	0.000801776	5	1	0.000801776
R02100	0.0022096	6	3	0.000736532
R00512	0.00294452	7	4	0.000736129
R02142	0.00208448	6	3	0.000694826
R02331	0.00197191	5	3	0.000657304
R01067	0.00261114	8	4	0.000652786
R02098	0.00257521	7	4	0.000643802
R00405	0.00383569	12	6	0.000639282
R00432	0.00383569	12	6	0.000639282
R00727	0.00383569	12	6	0.000639282
R01993	0.0024421	8	4	0.000610526
R01911	0.000577035	2	1	0.000577035
R03545	0.000577035	2	1	0.000577035
R03157	0.000577035	2	1	0.000577035
R08193	0.000577035	2	1	0.000577035
R03158	0.000577035	2	1	0.000577035
R01920	0.000577035	2	1	0.000577035
R03544	0.000577035	2	1	0.000577035
R07384	0.000577035	2	1	0.000577035
R02869	0.000577035	2	1	0.000577035
R04448	0.000577035	2	1	0.000577035
R01876	0.000577035	2	1	0.000577035
R01909	0.000577035	2	1	0.000577035
R03223	0.000577035	2	1	0.000577035
R01274	0.000577035	2	1	0.000577035
R00416	0.000577035	2	1	0.000577035
R01280	0.000577035	2	1	0.000577035
R01055	0.000577035	2	1	0.000577035
R07381	0.000577035	2	1	0.000577035
R02493	0.000577035	2	1	0.000577035
R02494	0.000577035	2	1	0.000577035
R05052	0.000577035	2	1	0.000577035
R05053	0.000577035	2	1	0.000577035
R02164	0.00403216	13	7	0.000576023
R00408	0.00403216	13	7	0.000576023
R00412	0.00403216	13	7	0.000576023
R01230	0.00397265	12	7	0.000567521
R01231	0.00397265	12	7	0.000567521
R00161	0.000561002	3	1	0.000561002
R00549	0.00111634	4	2	0.000558172
R04869	0.000551334	3	1	0.000551334
R04355	0.00551042	20	10	0.000551042
R07762	0.00603625	22	11	0.00054875
R04952	0.00603032	22	11	0.000548211
R04968	0.00603009	22	11	0.00054819
R04726	0.00603	22	11	0.000548182
R04963	0.00602818	22	11	0.000548016
R04957	0.0060238	22	11	0.000547618
R01130	0.00433426	15	8	0.000541783
R01869	0.00214395	8	4	0.000535987
R01868	0.00214395	8	4	0.000535987
R01867	0.00214395	8	4	0.000535987
R04960	0.00694094	26	13	0.000533919
R07765	0.000533058	2	1	0.000533058
R01799	0.00212902	8	4	0.000532254
R01229	0.00265728	8	5	0.000531456
R07763	0.00105995	4	2	0.000529977
R07764	0.00105059	4	2	0.000525297
R01870	0.00262289	10	5	0.000524577
R04533	0.00104826	4	2	0.000524131
R04386	0.0125764	47	24	0.000524016
R01082	0.00262003	9	5	0.000524007
R04543	0.00104555	4	2	0.000522775
R04566	0.00104538	4	2	0.000522689
R04953	0.00104524	4	2	0.00052262
R04964	0.00104521	4	2	0.000522605
R04534	0.00103098	4	2	0.000515489
R04536	0.00103079	4	2	0.000515395
R04969	0.00154393	6	3	0.000514644
R04970	0.00154393	6	3	0.000514644
R04430	0.00154369	6	3	0.000514565
R04429	0.00154369	6	3	0.000514565
R04966	0.00154304	6	3	0.000514346
R04967	0.00154304	6	3	0.000514346
R04725	0.00154299	6	3	0.00051433
R04724	0.00154299	6	3	0.00051433
R04955	0.00154213	6	3	0.000514045
R04956	0.00154213	6	3	0.000514045
R04961	0.00153966	6	3	0.000513218
R04962	0.00153966	6	3	0.000513218
R00514	0.00204259	5	4	0.000510648
R04428	0.00152775	6	3	0.000509249
R04544	0.00152673	6	3	0.000508909
R04568	0.00152615	6	3	0.000508716
R04965	0.00152605	6	3	0.000508683
R04954	0.00152558	6	3	0.000508526
R04535	0.00151811	6	3	0.000506037
R01829	0.00101099	4	2	0.000505493
R06869	0.000503169	3	1	0.000503169
R07770	0.000495448	2	1	0.000495448
R05970	0.000494807	2	1	0.000494807
R04537	0.00147635	6	3	0.000492118
R02024	0.00294668	12	6	0.000491113
R06868	0.000490133	2	1	0.000490133
R05616	0.000980099	4	2	0.000490049
R03291	0.000980099	4	2	0.000490049
R03293	0.000980099	4	2	0.000490049
R03295	0.000980099	4	2	0.000490049
R05000	0.000980099	4	2	0.000490049
R04921	0.000980099	4	2	0.000490049
R04920	0.000980099	4	2	0.000490049
R04247	0.000980099	4	2	0.000490049
R03821	0.000980099	4	2	0.000490049
R08364	0.000980099	4	2	0.000490049
R08362	0.000980099	4	2	0.000490049
R07273	0.000980099	4	2	0.000490049
R04958	0.00244351	10	5	0.000488702
R04959	0.00244351	10	5	0.000488702
R07768	0.00243409	10	5	0.000486817
R07766	0.00243409	10	5	0.000486817
R02016	0.000973203	4	2	0.000486601
R05634	0.00048443	2	1	0.00048443
R07771	0.00144315	6	3	0.000481051
R05969	0.000960591	4	2	0.000480296
R05692	0.000479415	2	1	0.000479415
R07769	0.00143743	6	3	0.000479145
R07767	0.00143743	6	3	0.000479145
R00965	0.00142351	5	3	0.000474504
R01665	0.000948394	4	2	0.000474197
R02630	0.000937609	4	2	0.000468805
R01326	0.000937609	4	2	0.000468805
R02101	0.00562187	23	12	0.00046849
R05637	0.000936177	4	2	0.000468089
R01624	0.0102887	43	22	0.000467669
R00768	0.00323845	10	7	0.000462635
R01009	0.00184937	8	4	0.000462342
R00888	0.00184875	8	4	0.000462188
R01818	0.00184523	8	4	0.000461306
R00299	0.000922369	4	2	0.000461185
R07324	0.000922369	4	2	0.000461185
R01146	0.00138316	6	3	0.000461054
R03239	0.00138316	6	3	0.000461054
R00605	0.00138316	6	3	0.000461054
R00602	0.00138316	6	3	0.000461054
R00608	0.00138316	6	3	0.000461054
R03236	0.00138316	6	3	0.000461054
R03237	0.00138316	6	3	0.000461054
R03238	0.00138316	6	3	0.000461054
R00883	0.00183606	8	4	0.000459014
R00885	0.00183606	8	4	0.000459014
R03503	0.000913609	4	2	0.000456804
R02326	0.00135506	6	3	0.000451686
R01132	0.00225805	9	5	0.00045161
R01128	0.00225805	9	5	0.00045161
R08639	0.00135299	6	3	0.000450997
R03067	0.00135281	6	3	0.000450938
R03066	0.00135281	6	3	0.000450938
R04286	0.000890662	4	2	0.000445331
R04620	0.000890662	4	2	0.000445331
R08689	0.00221998	10	5	0.000443996
R02003	0.0013276	6	3	0.000442534
R01122	0.0013276	6	3	0.000442534
R02237	0.00307801	14	7	0.000439715
R08210	0.00263596	12	6	0.000439327
R05884	0.00263596	12	6	0.000439327
R07219	0.00263596	12	6	0.000439327
R08209	0.00263596	12	6	0.000439327
R01658	0.00263487	12	6	0.000439145
R01933	0.000437708	2	1	0.000437708
R00332	0.0039272	16	9	0.000436356
R02571	0.000870219	3	2	0.00043511
R02187	0.00215887	10	5	0.000431774
R01600	0.00215887	10	5	0.000431774
R09086	0.00215887	10	5	0.000431774
R00548	0.000859887	3	2	0.000429943
R04639	0.00128865	6	3	0.000429548
R02236	0.00300113	14	7	0.000428733
R02235	0.00300113	14	7	0.000428733
R00115	0.00170735	12	4	0.000426838
R00959	0.00297709	14	7	0.000425298
R02739	0.00467246	22	11	0.000424769
R00575	0.00169795	12	4	0.000424488
R04385	0.000846111	3	2	0.000423056
R00181	0.00380738	20	9	0.000423042
R02189	0.00253558	12	6	0.000422596
R01786	0.00253558	12	6	0.000422596
R01788	0.00253558	12	6	0.000422596
R09085	0.00253558	12	6	0.000422596
R02570	0.00380229	14	9	0.000422477
R00158	0.00168712	8	4	0.00042178
R00084	0.000418577	2	1	0.000418577
R01083	0.00208746	12	5	0.000417493
R02239	0.00375571	14	9	0.000417301
R02240	0.00375571	14	9	0.000417301
R01801	0.000830578	4	2	0.000415289
R03197	0.000822897	4	2	0.000411449
R03321	0.00533444	26	13	0.000410341
R02035	0.000817458	4	2	0.000408729
R02740	0.00570783	28	14	0.000407702
R03940	0.00040695	9	1	0.00040695
R03270	0.000804742	8	2	0.000402371
R00570	0.00240119	13	6	0.000400198
R02251	0.00320108	12	8	0.000400135
R02250	0.00320108	12	8	0.000400135
R00703	0.00399969	20	10	0.000399969
R01447	0.00399969	20	10	0.000399969
R00196	0.00399969	20	10	0.000399969
R03920	0.00319298	16	8	0.000399122
R00867	0.00319298	16	8	0.000399122
R06895	0.00119273	6	3	0.000397578
R03220	0.00119273	6	3	0.000397578
R00847	0.0015894	8	4	0.00039735
R00841	0.0015894	8	4	0.00039735
R00851	0.0015894	8	4	0.00039735
R01547	0.00118315	6	3	0.000394382
R02073	0.00354576	18	9	0.000393974
R09084	0.00354576	18	9	0.000393974
R04780	0.00354576	18	9	0.000393974
R04779	0.00354576	18	9	0.000393974
R00199	0.00587657	30	15	0.000391771
R02320	0.00587657	30	15	0.000391771
R01137	0.0015668	8	4	0.0003917
R01138	0.0015668	8	4	0.0003917
R00036	0.000781228	4	2	0.000390614
R02094	0.0015544	7	4	0.0003886
R05688	0.000387767	2	1	0.000387767
R00316	0.00115794	6	3	0.00038598
R01518	0.000771776	4	2	0.000385888
R02057	0.00423667	19	11	0.000385152
R00377	0.00153915	8	4	0.000384788
R00014	0.00575457	26	15	0.000383638
R01830	0.00727304	39	19	0.000382791
R01257	0.00381759	20	10	0.000381759
R00658	0.00305378	16	8	0.000381722
R05048	0.000762607	4	2	0.000381303
R00212	0.0106545	56	28	0.000380519
R01196	0.0106545	56	28	0.000380519
R00209	0.0106545	56	28	0.000380519
R00848	0.00265988	14	7	0.000379983
R00842	0.00265988	14	7	0.000379983
R01049	0.00151874	8	4	0.000379685
R02090	0.00113887	6	3	0.000379623
R01857	0.00151742	8	4	0.000379355
R01858	0.00151742	8	4	0.000379355
R01325	0.00189028	10	5	0.000378056
R00375	0.00188772	10	5	0.000377545
R07601	0.00188568	6	5	0.000377135
R07599	0.00188568	6	5	0.000377135
R07603	0.00188568	6	5	0.000377135
R00939	0.00452189	23	12	0.000376824
R00936	0.00452189	23	12	0.000376824
R04125	0.00338199	23	9	0.000375777
R00376	0.00186979	10	5	0.000373957
R05636	0.00708733	39	19	0.000373017
R00236	0.00782737	42	21	0.000372732
R00229	0.00782737	42	21	0.000372732
R00235	0.00782737	42	21	0.000372732
R00742	0.0078161	23	21	0.000372195
R05351	0.00743947	40	20	0.000371973
R00238	0.00743947	40	20	0.000371973
R01324	0.00295315	16	8	0.000369143
R02568	0.00147484	8	4	0.00036871
R01900	0.00183743	10	5	0.000367485
R00351	0.0106419	58	29	0.000366961
R00352	0.0106419	58	29	0.000366961
R00362	0.0106419	58	29	0.000366961
R03778	0.00805874	45	22	0.000366307
R03858	0.00805874	45	22	0.000366307
R04747	0.00805874	45	22	0.000366307
R04742	0.00805874	45	22	0.000366307
R03991	0.00805874	45	22	0.000366307
R01177	0.00805874	45	22	0.000366307
R00341	0.00475323	26	13	0.000365633
R00431	0.00475323	26	13	0.000365633
R00726	0.00475323	26	13	0.000365633
R00345	0.00475323	26	13	0.000365633
R00378	0.00146181	9	4	0.000365452
R03174	0.000364632	4	1	0.000364632
R02662	0.000364632	4	1	0.000364632
R02017	0.00255115	14	7	0.00036445
R01070	0.00542027	31	15	0.000361351
R00200	0.00758063	42	21	0.000360982
R02018	0.00144262	7	4	0.000360655
R02038	0.000720736	5	2	0.000360368
R01225	0.00324278	17	9	0.000360309
R00940	0.00360202	19	10	0.000360202
R00937	0.00360202	19	10	0.000360202
R02052	0.00107754	8	3	0.000359182
R01899	0.00178986	10	5	0.000357972
R02093	0.00107307	7	3	0.000357689
R00621	0.00463422	14	13	0.000356479
R00709	0.00355154	21	10	0.000355154
R04097	0.00283567	19	8	0.000354459
R02736	0.00318392	16	9	0.000353769
R01512	0.00105988	6	3	0.000353292
R02569	0.00916355	48	26	0.000352444
R00268	0.00281323	17	8	0.000351653
R07618	0.00175457	12	5	0.000350915
R02092	0.00105259	5	3	0.000350862
R00130	0.00245537	15	7	0.000350767
R01015	0.00385389	23	11	0.000350354
R03222	0.00105031	6	3	0.000350102
R00122	0.0017389	8	5	0.00034778
R01625	0.00277671	9	8	0.000347089
R01057	0.00104036	6	3	0.000346785
R01056	0.00172812	11	5	0.000345624
R00942	0.0027576	15	8	0.0003447
R01529	0.00137101	9	4	0.000342753
R01061	0.00308468	19	9	0.000342742
R01063	0.00308468	19	9	0.000342742
R01066	0.00272844	17	8	0.000341055
R01068	0.00272844	17	8	0.000341055
R01641	0.00405802	25	12	0.000338168
R02019	0.00235934	14	7	0.000337049
R07456	0.00398967	14	12	0.000332473
R01221	0.00198917	12	6	0.000331529
R07376	0.000988057	7	3	0.000329352
R02055	0.000988057	7	3	0.000329352
R00355	0.00750922	50	23	0.000326488
R00127	0.00259975	14	8	0.000324969
R00945	0.00486153	30	15	0.000324102
R00192	0.000323503	2	1	0.000323503
R00155	0.000968549	5	3	0.00032285
R00248	0.00449325	27	14	0.000320946
R00243	0.00449325	27	14	0.000320946
R00267	0.00416755	25	13	0.000320581
R01135	0.00350874	16	11	0.000318976
R01802	0.00190356	13	6	0.00031726
R05578	0.00284734	17	9	0.000316371
R00357	0.00379127	27	12	0.000315939
R02095	0.000623548	5	2	0.000311774
R03662	0.000622959	2	2	0.000311479
R08218	0.000622959	2	2	0.000311479
R00328	0.00155733	9	5	0.000311466
R00093	0.00427454	26	14	0.000305324
R00114	0.00427454	26	14	0.000305324
R00256	0.00392447	26	13	0.000301882
R00253	0.00392447	26	13	0.000301882
R03652	0.000901082	10	3	0.000300361
R05046	0.000589355	4	2	0.000294678
R00310	0.000589237	5	2	0.000294618
R00124	0.0017613	12	6	0.00029355
R03815	0.00029189	1	1	0.00029189
R00894	0.00379242	27	13	0.000291724
R01468	0.000290764	3	1	0.000290764
R00430	0.0017075	15	6	0.000284583
R00330	0.0017075	15	6	0.000284583
R00551	0.000567509	5	2	0.000283754
R07377	0.000566939	6	2	0.00028347
R00830	0.00196534	13	7	0.000280763
R04858	0.000557525	4	2	0.000278763
R03522	0.000557379	2	2	0.000278689
R00274	0.000557379	3	2	0.000278689
R01528	0.00166956	11	6	0.00027826
R00588	0.00165082	13	6	0.000275137
R03654	0.00191174	7	7	0.000273106
R00569	0.00108876	8	4	0.000272189
R01397	0.00189977	9	7	0.000271395
R00497	0.0021549	16	8	0.000269362
R00086	0.00103574	9	4	0.000258935
R03362	0.0010328	9	4	0.0002582
R03363	0.0010328	9	4	0.0002582
R05916	0.0010328	9	4	0.0002582
R00442	0.00154346	13	6	0.000257244
R07411	0.000510477	5	2	0.000255239
R03332	0.00126884	5	5	0.000253767
R00899	0.00227771	19	9	0.000253079
R03435	0.000503791	9	2	0.000251896
R00722	0.000250688	3	1	0.000250688
R03361	0.0015035	13	6	0.000250584
R00156	0.00149698	13	6	0.000249496
R02422	0.000247349	2	1	0.000247349
R03646	0.000247349	1	1	0.000247349
R00667	0.000247349	2	1	0.000247349
R00896	0.000735534	9	3	0.000245178
R00895	0.000735534	9	3	0.000245178
R00578	0.00195978	24	8	0.000244973
R00428	0.000973679	11	4	0.00024342
R00435	0.00145347	12	6	0.000242245
R00104	0.00096703	10	4	0.000241757
R00112	0.00096703	10	4	0.000241757
R00927	0.000239482	23	1	0.000239482
R01354	0.000239482	2	1	0.000239482
R00177	0.00047835	5	2	0.000239175
R04313	0.000238689	1	1	0.000238689
R02037	0.000474798	3	2	0.000237399
R00571	0.00140753	13	6	0.000234589
R00573	0.00140753	13	6	0.000234589
R00441	0.0014055	15	6	0.00023425
R07412	0.00023119	2	1	0.00023119
R00483	0.00092116	12	4	0.00023029
R00485	0.00092116	12	4	0.00023029
R02480	0.0004586	2	2	0.0002293
R07460	0.000900194	4	4	0.000225049
R03650	0.000900194	4	4	0.000225049
R00257	0.000671813	6	3	0.000223938
R00189	0.000671813	6	3	0.000223938
R00653	0.000222088	3	1	0.000222088
R05577	0.00107949	5	5	0.000215899
R00443	0.00150342	14	7	0.000214775
R00434	0.000841436	5	4	0.000210359
R01232	0.000841436	4	4	0.000210359
R00335	0.000841436	9	4	0.000210359
R03469	0.000629606	6	3	0.000209869
R04404	0.000629606	6	3	0.000209869
R00159	0.00103899	9	5	0.000207799
R01312	0.00020703	6	1	0.00020703
R02114	0.00020703	1	1	0.00020703
R00961	0.000193098	6	1	0.000193098
R00719	0.000193098	2	1	0.000193098
R03659	0.000376935	3	2	0.000188467
R00926	0.000359827	4	2	0.000179913
R04936	0.000178981	1	1	0.000178981
R04867	0.000178981	2	1	0.000178981
R03104	0.000355416	2	2	0.000177708
R00734	0.000339265	5	2	0.000169632
R01253	0.000339265	5	2	0.000169632
R01251	0.000339265	5	2	0.000169632
R00729	0.000339265	5	2	0.000169632
R09254	0.000339265	5	2	0.000169632
R01248	0.000339265	5	2	0.000169632
R03648	0.000507334	3	3	0.000169111
R02918	0.000495849	3	3	0.000165283
R03661	0.000495849	3	3	0.000165283
R00688	0.000423417	8	3	0.000141139
R00689	0.000423417	8	3	0.000141139
R00694	0.000423417	8	3	0.000141139
R00692	0.000423417	8	3	0.000141139
R03660	0.000555857	4	4	0.000138964
R00698	0.000555857	4	4	0.000138964
R04939	0.000108737	2	1	0.000108737
R01736	0.000108737	1	1	0.000108737
R01206	0.000108737	1	1	0.000108737
R04866	0.000108737	2	1	0.000108737
R01716	0.000108737	1	1	0.000108737
R03658	9.76459e-05	1	1	9.76459e-05
R08359	9.76459e-05	1	1	9.76459e-05
R02530	0.000026095745	1	0	#DIV/0!
